# Supplementary material
Source: Springer Nature journal article supplement (https://www.springermedizin.de/resource/supplementary/12885_2009_1634_MOESM1_ESM.pdf/9472522)
Supplement: MOESM1 [file 9472522]

| Tumour number | Sex | Age | Tumour Diagnosis                | Cisplatin IndexSUM | Gemcitabine IndexSUM | Docetaxel IndexSUM | Cisplatin + Gemcitabine IndexSUM | Docetaxel + Cisplatin IndexSUM | Docetaxel + Gemcitabine IndexSUM | 18s       | Akt       | APAF1        | APC C-term   | APC N-term   | ATM kinase   | ATP7B        | Bad       | Bax       | Bcl-x(L)  |
|---------------|-----|-----|---------------------------------|--------------------|----------------------|--------------------|----------------------------------|--------------------------------|----------------------------------|-----------|-----------|--------------|--------------|--------------|--------------|--------------|-----------|-----------|-----------|
| 1             | F   | 56  | Lung Ca Adeno                   | Undetermined       | Undetermined         | 368                | 103                              | Undetermined                   | Undetermined                     | NR_003286 | NM_005163 | NM_181861    | NM_000038    | NM_000038    | NM_000051    | NM_000053    | NM_004322 | NM_004324 | NM_000633 |
| 2             | F   | 53  | Lung Ca NSCLC neuroendocrine    | Undetermined       | Undetermined         | Undetermined       | Undetermined                     | Undetermined                   | Undetermined                     | 26.714071 | 30.409546 | 35.263317    | 35.61232     | 30.932293    | 32.68809     | 34.9393      | 33.507336 | 31.261356 | 30.964888 |
| 3             | F   | 71  | Lung Ca Adeno                   | Undetermined       | Undetermined         | Undetermined       | Undetermined                     | Undetermined                   | Undetermined                     | 22.94818  | 27.02556  | 30.917788    | 30.933215    | 28.549892    | 30.02757     | 30.154339    | 30.885082 | 26.387508 | 27.4518   |
| 4             | M   | 60  | Lung Ca SCC                     | 602                | 400                  | 657                | 155                              | 328                            | 413                              | 25.95213  | 31.840782 | 35.154106    | Undetermined | 31.694975    | 31.757391    | Undetermined | 36.98911  | 32.20056  | 30.949198 |
| 5             | M   | 76  | Lung Ca Adeno                   | Undetermined       | Undetermined         | Undetermined       | Undetermined                     | Undetermined                   | 512                              | 16.288642 | 26.50678  | 31.351406    | 31.692806    | 28.51433     | 29.814241    | 28.927946    | 30.282375 | 26.842173 | 26.399696 |
| 6             | M   | 72  | Lung Ca Adeno                   | 361                | 470                  | 184                | 143                              | Undetermined                   | Undetermined                     | 25.418726 | 28.122845 | 33.922676    | 36.98203     | 31.970816    | 32.96515     | 33.911324    | 32.30986  | 29.12078  | 28.455183 |
| 7             | M   | 66  | Lung Ca NSCLC neuroendocrine    | 546                | 500                  | 500                | 446                              | Undetermined                   | Undetermined                     | 16.614735 | 25.31822  | 30.57125     | 32.117065    | 27.933676    | 28.958595    | 29.956148    | 29.674833 | 26.65926  | 25.95016  |
| 8             | F   | 66  | Lung Ca Adeno                   | 400                | 282                  | 539                | 114                              | Undetermined                   | Undetermined                     | 20.369766 | 27.411245 | 31.32856     | 35.90305     | 29.651726    | 31.644878    | 29.704283    | 31.971111 | 26.951984 | 27.449327 |
| 9             | M   | 53  | Lung Ca Adeno                   | 324                | 280                  | 395                | 223                              | Undetermined                   | Undetermined                     | 20.97774  | 27.946842 | 32.946803    | 35.918833    | 30.327417    | 31.770723    | 31.770723    | 33.762123 | 28.040178 | 28.270916 |
| 10            | M   | 60  | Lung Ca SCC                     | 239                | 259                  | 102                | 168                              | Undetermined                   | Undetermined                     | 17.776785 | 26.212011 | 31.7038      | 34.37176     | 29.962867    | 31.347034    | 33.66014     | 29.613209 | 27.240753 | 25.79764  |
| 11            | M   | 68  | Lung Ca Adeno                   | 475                | 300                  | 647                | 196                              | 333                            | Undetermined                     | 16.697548 | 26.96104  | 33.787106    | 36.129192    | 30.46932     | 33.21678     | 31.921825    | 30.927626 | 27.363165 | 26.401237 |
| 12            | F   | 57  | Lung Ca SCC                     | 542                | Undetermined         | 365                | Undetermined                     | Undetermined                   | Undetermined                     | 28.988285 | 33.840485 | 35.093117    | 33.973206    | 31.181301    | 32.95219     | Undetermined | 35.791477 | 31.711935 | 31.754454 |
| 13            | M   | 69  | Lung Ca Adeno                   | 363                | 524                  | 531                | 306                              | 407                            | 388                              | 17.983992 | 26.457954 | 30.951214    | 31.687496    | 27.363588    | 29.810476    | 28.894907    | 29.962772 | 25.957472 | 24.94512  |
| 14            | F   | 69  | Lung Ca Adeno                   | 500                | 383                  | 610                | 220                              | Undetermined                   | Undetermined                     | 27.93206  | 31.68249  | 34.6992      | 36.9632      | 31.925821    | 34.46517     | Undetermined | 34.971896 | 31.433228 | 29.927082 |
| 15            | F   | 65  | Lung Ca SCC                     | 350                | 314                  | 507                | 138                              | Undetermined                   | Undetermined                     | 24.196888 | 30.96287  | 38.356978    | 34.30382     | 31.539827    | 31.959967    | 32.868164    | 33.581956 | 31.272964 | 30.229836 |
| 16            | M   | 56  | Lung Ca SCC                     | 540                | 417                  | 522                | 273                              | 471                            | 357                              | 22.877743 | 29.578022 | 36.593163    | Undetermined | Undetermined | Undetermined | Undetermined | 33.38884  | 30.949597 | 30.594805 |
| 17            | F   | 69  | Lung Ca SCC                     | 473                | 240                  | 763                | 248                              | 447                            | 208                              | 19.234324 | 26.82773  | 31.264515    | 32.42906     | 28.217466    | 30.624058    | 30.948892    | 33.78883  | 26.66431  | 26.27496  |
| 18            | F   | 66  | Lung Ca SCC                     | 511                | 474                  | 523                | 484                              | 504                            | 278                              | 20.90831  | 29.817995 | 31.942081    | 34.51961     | 29.953047    | 29.946459    | 29.970993    | 31.842485 | 27.219213 | 27.658463 |
| 19            | F   | 59  | Lung Ca SCC                     | 587                | 380                  | 671                | 384                              | 476                            | 303                              | 23.006903 | 29.891693 | 33.159573    | 36.908722    | 29.681583    | 30.12098     | 31.92443     | 32.501137 | 27.64781  | 28.497347 |
| 20            | F   | 60  | Lung Ca (Bronchogenic Ca)       | 107                | 181                  | 107                | 54                               | Undetermined                   | Undetermined                     | 24.72551  | 31.972815 | 35.377642    | Undetermined | 32.30086     | 33.850716    | 35.930424    | 35.95356  | 30.963612 | 31.476103 |
| 21            | M   | 71  | Lung Ca                         | 671                | 489                  | 688                | 486                              | Undetermined                   | Undetermined                     | 17.289313 | 25.910837 | 33.052843    | 35.44271     | 28.955404    | 32.483868    | 31.348434    | 31.048216 | 27.794329 | 27.950775 |
| 22            | M   | 56  | Lung Ca Adeno                   | Undetermined       | Undetermined         | Undetermined       | Undetermined                     | Undetermined                   | Undetermined                     | 25.540216 | 32.097683 | 35.27648     | Undetermined | 33.929896    | 32.89979     | 33.929096    | 35.67755  | 31.95862  | 32.195308 |
| 23            | M   | 60  | Lung Ca SCC                     | 310                | 467                  | 555                | 206                              | Undetermined                   | Undetermined                     | 21.549131 | 28.947092 | 31.887099    | 33.122585    | 28.942732    | 30.341991    | Undetermined | 30.968756 | 26.95011  | 27.946156 |
| 24            | F   | 63  | Lung Ca SCC                     | 488                | 376                  | 685                | 132                              | 341                            | 372                              | 17.059437 | 25.956457 | 33.36124     | Undetermined | 30.391266    | 29.92599     | 28.88511     | 25.445257 | 26.93253  | 25.740435 |
| 25            | M   | 71  | Lung Ca Adeno                   | 327                | 198                  | 84                 | Undetermined                     | Undetermined                   | Undetermined                     | 15.974095 | 24.520163 | 31.530624    | 35.90667     | 29.440372    | 30.947157    | 29.050295    | 27.857393 | 24.954105 | 25.740435 |
| 26            | M   | 72  | Lung Ca Adeno                   | 501                | 539                  | 404                | 131                              | 194                            | 370                              | 28.375862 | 29.973867 | 31.972815    | Undetermined | 31.768545    | 31.970493    | Undetermined | 32.91848  | 28.938768 | 28.967909 |
| 27            | F   | 62  | Lung Ca SCC                     | 482                | 370                  | 540                | 198                              | 390                            | 284                              | 14.944512 | 26.4403   | 31.39722     | 33.162113    | 28.311949    | 30.05639     | 29.528978    | 28.58903  | 25.4826   | 26.555979 |
| 28            | M   | 68  | Lung Ca Adeno                   | 564                | 468                  | 549                | 203                              | 352                            | 355                              | 14.780874 | 25.190474 | 29.408033    | 31.539536    | 27.25208     | 27.79518     | 28.371836    | 28.272179 | 24.7261   | 25.941038 |
| 29            | M   | 79  | Lung Ca SCC                     | 406                | 367                  | 387                | 194                              | 393                            | 290                              | 16.995415 | 25.960274 | 31.957848    | 34.63838     | 28.949516    | 29.599731    | 31.832787    | 28.98156  | 25.602855 | 26.620597 |
| 30            | M   | 70  | Lung Ca Adeno                   | 543                | 123                  | 584                | 81                               | Undetermined                   | Undetermined                     | 14.937568 | 26.003815 | Undetermined | 32.89504     | 28.950815    | 28.502485    | 26.627508    | 28.934431 | 25.897005 | 25.612095 |
| 31            | F   | 61  | Lung Ca SCC                     | 409                | 347                  | 429                | 200                              | 363                            | 292                              | 17.964664 | 26.01144  | 32.97061     | 31.906413    | 31.906431    | 34.267574    | 31.02158     | 29.528479 | 26.954674 | 25.75518  |
| 32            | M   | 65  | Lung Ca SCC                     | 520                | 552                  | 589                | 346                              | 398                            | 454                              | 15.482325 | 26.80378  | 32.903225    | 34.18976     | 30.6214      | 32.831375    | 30.23239     | 29.997684 | 26.519182 | 26.110115 |
| 33            | M   | 71  | Lung Ca SCC                     | 382                | 347                  | 461                | 137                              | Undetermined                   | Undetermined                     | 21.757376 | 28.96009  | 34.98197     | 35.93673     | 32.73913     | 34.410866    | 33.355118    | 32.075362 | 29.646906 | 29.678087 |
| 34            | F   | 55  | Lung Ca Adeno                   | 378                | 218                  | 366                | Undetermined                     | Undetermined                   | Undetermined                     | 24.931095 | 30.99979  | 34.818672    | 38.93956     | 31.734177    | 31.949518    | 32.92738     | 33.87342  | 30.58395  | 30.378006 |
| 35            | M   | 82  | Lung Ca SCC                     | 278                | 200                  | 536                | 161                              | 338                            | 229                              | 15.983545 | 25.539358 | 31.981548    | 33.920002    | 28.911745    | 30.39781     | 30.804699    | 29.69632  | 24.945831 | 25.439281 |
| 36            | F   | 67  | Lung Ca Adeno                   | 387                | 380                  | 331                | 61                               | 296                            | 296                              | 23.886917 | 28.540384 | Undetermined | Undetermined | 36.92527     | Undetermined | Undetermined | 32.970905 | 29.736147 | 29.950542 |
| 37            | M   | 56  | Lung Ca Atypical Neuroendocrine | 580                | 425                  | 408                | Undetermined                     | Undetermined                   | Undetermined                     | 17.95884  | 27.939823 | 30.872807    | 31.918232    | 27.921362    | 28.691822    | 27.293121    | 31.118885 | 26.98192  | 27.62604  |
| 38            | M   | 63  | Lung Ca Adeno                   | 402                | 214                  | 514                | 115                              | 473                            | 310                              | 27.807209 | 30.881313 | 34.568455    | Undetermined | 31.611538    | 33.274693    | 32.60729     | 35.993202 | 29.74717  | 29.94028  |
| 39            | M   | 63  | Lung Ca SCC                     | 380                | 302                  | 627                | 146                              | 390                            | 332                              | 20.086416 | 27.706059 | 36.95478     | Undetermined | 35.698463    | 35.951324    | 35.001736    | 31.466597 | 28.79396  | 28.68721  |
| 40            | M   | 60  | Lung Ca Adeno                   | 515                | 551                  | 366                | Undetermined                     | Undetermined                   | Undetermined                     | 27.45663  | 31.706649 | 35.95672     | Undetermined | 32.938954    | 32.963526    | 35.013737    | 35.974792 | 29.54416  | 31.283836 |
| 41            | M   | 80  | Lung Ca SCC                     | 343                | 357                  | 460                | 172                              | 377                            | 395                              | 17.78681  | 26.328468 | 30.696932    | 31.534758    | 27.913458    | 28.965961    | 31.856636    | 30.475624 | 25.45235  | 26.868226 |
| 42            | M   | 65  | Lung Ca SCC                     | 465                | 462                  | 606                | 246                              | Undetermined                   | Undetermined                     | 18.97128  | 28.95673  | 34.973766    | Undetermined | 32.652622    | 33.81961     | 33.802605    | 32.951015 | 28.667955 | 29.577133 |

| Bcl2         | BCRP         | Beta-tubulin III | Bid       | BRCA1        | c-FLIP      | CES1      | CES2      | eN II     | COX2      | DPD       | EGFR      | ERCC1     | ERCC2     | Fas          | Fas-L        | FPGS      | gamma H2AX |
|--------------|--------------|------------------|-----------|--------------|-------------|-----------|-----------|-----------|-----------|-----------|-----------|-----------|-----------|--------------|--------------|-----------|------------|
| NM_138578    | NM_004827    | NM_006086        | NM_197966 | NM_007294    | NM_01025195 | NM_003869 | NM_003879 | NM_012229 | NM_000963 | NM_000110 | NM_005228 | NM_001983 | NM_000400 | NM_000043    | NM_000639    | NM_004957 | NM_002105  |
| 34.907988    | 34.431854    | 34.720512        | 33.828964 | Undetermined | 30.546399   | 31.952179 | 35.12412  | 31.364147 | 27.332514 | 29.949503 | 29.518114 | 29.957592 | 29.892218 | 32.991898    | Undetermined | 34.973156 | 29.831917  |
| 29.307116    | 32.979787    | 29.945984        | 28.965998 | 29.79718     | 27.729446   | 29.454796 | 30.699263 | 28.740969 | 30.050571 | 28.333353 | 30.989491 | 27.537687 | 29.380344 | 30.531555    | Undetermined | 32.77168  | 28.930997  |
| 36.9343      | Undetermined | 31.345772        | 35.960495 | 36.9917      | 31.95329    | 33.96483  | 34.98945  | 32.437393 | 30.002555 | 32.975372 | 28.972416 | 30.943834 | 30.921896 | 33.58876     | 30.928786    | 31.75639  | 26.770266  |
| 30.981188    | 28.376247    | 30.499887        | 27.888191 | 29.476055    | 28.127993   | 22.962276 | 30.974506 | 26.099571 | 32.392612 | 28.942965 | 27.291126 | 28.206783 | 30.38691  | 28.930668    | 32.915104    | 30.212593 | 25.973055  |
| 33.64345     | 32.410667    | 33.969982        | 32.402665 | 34.432278    | 29.109806   | 30.744658 | 33.410454 | 30.308193 | 31.966902 | 28.623983 | 30.00562  | 29.954044 | 33.953602 | 32.14229     | 33.954697    | 30.947235 | 28.98218   |
| 29.862091    | 30.336266    | 29.798199        | 28.127935 | 30.581123    | 25.944776   | 27.422836 | 28.901333 | 25.911293 | 30.943872 | 27.957994 | 27.97012  | 27.328274 | 29.961025 | 28.840523    | 32.616695    | 27.997469 | 27.071772  |
| 29.414986    | 32.436665    | 29.276161        | 31.679144 | 29.947882    | 31.121109   | 31.769526 | 28.66053  | 29.929924 | 29.929924 | 29.620804 | 28.478948 | 30.58619  | 31.950863 | 36.967777    | 32.9587      | 24.851044 |            |
| 33.936038    | 33.935616    | 30.962057        | 31.992441 | 34.843506    | 28.612665   | 28.812665 | 31.099115 | 32.751525 | 28.015032 | 33.67293  | 29.935678 | 30.687555 | 32.71112  | 31.801369    | 33.114143    | 32.720158 | 26.989313  |
| 31.31841     | 33.31438     | 28.97744         | 30.294159 | 31.20366     | 28.900812   | 28.948399 | 28.900812 | 30.755394 | 26.563745 | 28.953704 | 27.96725  | 27.823933 | 29.678556 | 28.623598    | 33.7688      | 30.952381 | 27.842188  |
| 32.719337    | 33.945915    | 29.603363        | 30.965988 | 31.832533    | 28.300692   | 30.937    | 30.73805  | 28.334598 | 31.96909  | 30.70882  | 27.776365 | 29.191854 | 31.58944  | 29.920874    | 35.957623    | 35.108597 | 27.00875   |
| 30.83625     | 32.52032     | 30.838724        | 30.580431 | 32.93058     | 27.564276   | 28.973541 | 31.632626 | 27.963726 | 29.68512  | 29.350168 | 28.955633 | 27.959942 | 29.932932 | 28.688164    | 33.630165    | 31.516296 | 27.96209   |
| Undetermined | Undetermined | 31.709864        | 33.97341  | 35.317444    | 32.34367    | 33.639885 | 34.98752  | 32.550316 | 32.47929  | 33.19299  | 28.694897 | 32.520057 | 32.520057 | 34.619984    | Undetermined | 35.46293  | 28.23525   |
| 30.947966    | 31.64882     | 29.96659         | 28.677628 | 31.448284    | 26.136137   | 27.305902 | 29.993607 | 25.936466 | 28.957922 | 26.197874 | 28.73199  | 27.844755 | 29.936872 | 28.598828    | 36.631645    | 29.897327 | 28.017242  |
| Undetermined | 33.812733    | 32.38548         | 33.712654 | 34.136227    | 31.95253    | 35.96463  | 31.946934 | 31.960598 | 30.8314   | 31.918474 | 31.918474 | 32.889008 | 34.947647 | 33.685574    | Undetermined | 36.425175 | 31.96961   |
| 34.95895     | 35.480534    | 35.954655        | 33.98521  | 33.148735    | 29.755959   | 30.598019 | 33.114559 | 30.802994 | 31.563124 | 31.503372 | 31.503372 | 31.280315 | 33.159239 | 32.924362    | Undetermined | 33.497215 | 31.991068  |
| 32.718613    | 35.933563    | 34.867916        | 33.300204 | 36.99408     | 32.204002   | 33.00261  | 32.49753  | 31.624025 | 35.298428 | 36.753147 | 31.978523 | 29.944284 | 31.691965 | 31.614296    | Undetermined | 35.95934  | 27.756966  |
| 30.845087    | 30.959503    | 28.725435        | 28.977282 | 29.828749    | 27.12932    | 28.253668 | 29.30714  | 26.60189  | 28.095888 | 28.624329 | 27.516033 | 29.131027 | 28.960964 | 34.95069     | 29.130227    | 29.79642  | 27.16437   |
| 33.933563    | 30.562105    | 31.959997        | 28.10456  | 29.746037    | 27.87126    | 24.467815 | 32.505474 | 27.97347  | 31.914633 | 29.314035 | 29.212568 | 28.753288 | 31.325104 | 31.075962    | 35.677242    | 32.920815 | 26.71727   |
| 31.121123    | 34.301476    | 30.484865        | 30.75259  | 30.59992     | 27.653131   | 30.864925 | 32.577583 | 28.964186 | 30.868818 | 28.936367 | 28.976246 | 29.194855 | 31.922882 | 30.739635    | 35.458717    | 34.30816  | 27.619857  |
| 34.959446    | 36.96967     | 29.638756        | 32.356148 | 35.950985    | 30.950891   | 32.946296 | 34.3926   | 32.955    | 31.03579  | 32.94247  | 27.4509   | 31.844727 | 29.924377 | 33.473114    | Undetermined | 33.250088 | 25.813427  |
| 31.481775    | 29.037432    | 28.292677        | 31.295317 | 32.31136     | 27.49124    | 29.970974 | 30.01508  | 29.510748 | 29.893644 | 30.334612 | 28.439318 | 26.970928 | 27.270056 | 29.966908    | 34.946887    | 28.710077 | 25.973543  |
| Undetermined | 35.242058    | 33.896832        | 33.903854 | 34.344456    | 31.160105   | 33.345455 | 34.70241  | 31.931425 | 32.98328  | 32.932373 | 30.764988 | 31.594112 | 32.476322 | 34.97932     | Undetermined | 35.946426 | 29.962315  |
| 32.29876     | 33.110367    | 28.43332         | 29.973152 | 31.928885    | 26.943972   | 28.942867 | 31.969902 | 27.87612  | 28.869524 | 26.892328 | 28.070364 | 28.945343 | 30.588999 | 29.951065    | 34.130005    | 32.958487 | 26.967766  |
| 29.686445    | 33.957306    | 29.19754         | 27.201105 | 30.305435    | 27.664476   | 25.522482 | 29.167803 | 28.9723   | 30.972357 | 30.972357 | 26.973463 | 25.958883 | 27.457619 | 28.879189    | 36.941963    | 31.072024 | 24.910257  |
| 28.971382    | 30.422794    | 27.697798        | 27.964525 | 29.318186    | 25.812407   | 21.76675  | 28.676076 | 26.677145 | 28.80608  | 28.848782 | 27.424238 | 25.661535 | 27.7866   | 27.929974    | 32.471045    | 30.083689 | 24.98344   |
| 33.95352     | 33.728522    | 32.965046        | 32.826584 | 33.95513     | 28.771812   | 34.932392 | 31.982079 | 30.880396 | 31.582079 | 30.880396 | 31.9798   | 31.070557 | 32.93496  | 32.938213    | 34.071045    | 35.969883 | 30.911028  |
| 27.753285    | 31.983172    | 29.955534        | 27.765207 | 29.18983     | 26.690128   | 28.95784  | 29.971008 | 26.909313 | 25.919954 | 28.330574 | 27.281103 | 26.715004 | 29.950169 | 27.29684     | 32.970596    | 30.51686  | 24.98529   |
| 29.970146    | 31.820913    | 26.580153        | 28.590237 | 28.944965    | 25.944794   | 26.23122  | 29.548094 | 24.934143 | 26.68112  | 27.975094 | 26.68112  | 27.946556 | 28.950891 | 28.807175    | 32.81199     | 28.800367 | 24.790308  |
| 30.205048    | 32.53196     | 29.172623        | 27.407478 | 29.927683    | 26.646517   | 28.649334 | 28.511646 | 26.326431 | 28.50426  | 27.913212 | 27.630348 | 26.23565  | 28.339005 | 28.511602    | 26.339005    | 24.917325 | 25.996672  |
| 29.568565    | 31.16685     | 26.667631        | 28.44827  | 27.602055    | 25.95602    | 27.945381 | 29.979351 | 25.962814 | 29.936929 | 27.93769  | 27.56315  | 26.534138 | 27.386433 | 28.49006     | 27.836575    | 28.79299  | 25.99672   |
| 29.441591    | 33.95498     | 31.465904        | 27.957636 | 30.58175     | 27.43843    | 30.990488 | 27.123543 | 30.990488 | 30.53944  | 30.53944  | 26.942651 | 26.95273  | 28.582748 | 27.775473    | 29.465475    | 30.704119 | 24.82101   |
| 31.076696    | 31.922546    | 29.478104        | 32.82694  | 29.498047    | 27.942327   | 22.767    | 29.919285 | 28.014957 | 30.991798 | 28.942657 | 26.00393  | 28.08813  | 29.506779 | 28.816027    | 31.251064    | 29.323484 | 26.645285  |
| 34.75275     | 37.00322     | 31.970535        | 30.263813 | 29.429842    | 32.5361     | 33.02894  | 31.589504 | 31.98603  | 31.45752  | 31.45752  | 27.702717 | 28.477781 | 31.014475 | 32.952658    | 37.066113    | 32.23288  | 26.749158  |
| 36.755295    | 32.896527    | 30.71137         | 33.626076 | 30.739973    | 31.878947   | 33.989874 | 31.707596 | 33.989874 | 32.749466 | 32.749466 | 28.147084 | 29.943132 | 30.928751 | 35.38144     | 34.817646    | 28.727903 | 26.727903  |
| 29.972342    | 27.932833    | 28.919298        | 28.56318  | 28.9681      | 26.454475   | 23.53783  | 25.88265  | 30.978786 | 27.762753 | 21.468027 | 25.398071 | 27.963211 | 27.933453 | 30.986977    | 29.742031    | 32.943117 | 25.943117  |
| 34.667408    | Undetermined | 33.177612        | 34.13938  | 36.93569     | 31.28166    | 34.33249  | 32.33721  | 31.377691 | 34.80659  | 36.95206  | 30.974274 | 28.98653  | 30.93428  | 33.29872     | Undetermined | 36.962643 | 25.708363  |
| 31.228704    | 31.100422    | 28.573473        | 29.659227 | 31.927141    | 26.859114   | 29.9702   | 31.146927 | 27.292883 | 28.98066  | 28.675907 | 29.659302 | 27.232927 | 29.544184 | 30.457542    | 34.65946     | 31.870186 | 28.12577   |
| 34.957954    | 34.75016     | 31.710928        | 32.70232  | 33.84253     | 29.91814    | 34.843735 | 35.960318 | 30.935875 | 31.98016  | 30.96755  | 31.304945 | 33.189823 | 33.843456 | Undetermined | Undetermined | 28.839418 |            |
| 31.497656    | 34.949184    | 31.05113         | 30.959679 | 35.36487     | 29.95171    | 30.959649 | 31.035715 | 30.569423 | 32.95462  | 34.236294 | 25.212233 | 27.543198 | 29.677624 | 29.969831    | 34.84024     | 34.95916  | 25.021477  |
| 35.258002    | Undetermined | 33.980865        | 32.8994   | 32.9418      | 30.948519   | 33.54911  | 34.50866  | 31.563402 | 29.397764 | 32.951996 | 32.92006  | 31.586481 | 34.29658  | 34.29658     | Undetermined | 31.499578 | 25.898516  |
| 31.098856    | 31.622602    | 28.427586        | 25.967773 | 28.245493    | 27.167488   | 23.462252 | 30.562578 | 26.489422 | 26.687534 | 27.05449  | 28.88596  | 26.958943 | 30.444296 | 27.962503    | 30.440029    | 25.969143 | 25.898516  |
| 33.130444    | 34.49255     | 29.969734        | 29.752554 | 33.18426     | 28.94166    | 26.945814 | 32.73203  | 29.95817  | 32.474407 | 30.968534 | 29.791256 | 29.327791 | 31.667341 | 30.720379    | 35.962288    | 33.908832 | 27.81923   |

| GCLC      | GCLM         | GST pl    | GTF2H2    | hENT1     | hENT2        | HER2         | HER3      | HER4         | HIF1A     | HPRT         | HSP60     | HSP70     | HSP90     | IAP2         | IGF1      | IGF1R        | IGF2         |          |
|-----------|--------------|-----------|-----------|-----------|--------------|--------------|-----------|--------------|-----------|--------------|-----------|-----------|-----------|--------------|-----------|--------------|--------------|----------|
| NM_001498 | NM_002061    | NM_000852 | NM_001515 | NM_004955 | NM_001532    | NM_004448    | NM_001982 | NM_005235    | NM_001530 | NM_000194    | NM_002156 | NM_002154 | NM_000348 | NM_001166    | NM_000618 | NM_000875    | NM_000612    |          |
| 30.65278  | 35.98646     | 28.38391  | 31.578088 | 29.967266 | 35.978264    | 34.158955    | 28.634317 | 31.44381     | 27.930712 | 35.946007    | 32.337444 | 29.548967 | 31.413054 | 33.954132    | 29.943626 | 30.544484    | 36.296734    |          |
| 29.905282 | 31.67301     | 24.90705  | 27.914726 | 28.139688 | 32.97946     | 34.9903      | 28.95431  | 30.31729     | 25.911853 | 31.00602     | 28.882107 | 27.681574 | 25.837155 | 29.228182    | 30.654005 | 29.541176    | 32.759813    |          |
| 32.48911  | 32.46326     | 29.32455  | 32.31647  | 32.95582  | Undetermined | 32.95892     | 32.96772  | 33.438564    | 26.043585 | 34.242424    | 30.91249  | 29.202486 | 30.337397 | 30.330573    | 28.92552  | 34.832552    | 34.63605     |          |
| 23.938805 | 26.37262     | 22.96335  | 27.831276 | 27.050457 | 31.990913    | 30.171732    | 27.67772  | 32.992424    | 24.756227 | 28.803034    | 27.077557 | 25.918985 | 29.335549 | 28.87933     | 30.872108 | 26.330812    | 32.95996     |          |
| 34.97982  | 35.98387     | 28.833897 | 29.62891  | 29.422014 | 33.880802    | 34.970753    | 29.974123 | 36.4623      | 28.964966 | 34.9465      | 31.351562 | 29.52112  | 30.561771 | 31.876895    | 30.759136 | Undetermined | 32.95996     |          |
| 26.445423 | 28.249994    | 22.438723 | 27.064556 | 26.398092 | 31.265516    | 28.968182    | 24.319508 | 32.61232     | 25.069527 | 30.577736    | 26.129772 | 26.861649 | 25.529793 | 28.411825    | 28.910534 | 25.403843    | 35.84899     |          |
| 28.92379  | 33.707077    | 26.974167 | 30.920962 | 34.987816 | 30.929496    | 34.987816    | 35.503094 | 27.961363    | 26.166851 | 30.963495    | 28.820574 | 26.355377 | 25.943256 | 30.93525     | 32.66371  | 27.924461    | 29.234266    |          |
| 32.293476 | 32.95485     | 25.652733 | 30.216777 | 29.951986 | 34.616898    | 31.861275    | 26.755957 | 34.940674    | 26.9315   | 32.84959     | 28.333263 | 28.926636 | 27.745905 | 30.08899     | 31.459557 | 30.08899     | Undetermined | 28.94695 |
| 29.596294 | 31.466206    | 24.158988 | 28.970251 | 29.58937  | 32.65891     | 28.321404    | 25.669819 | 35.394455    | 35.394455 | 31.824535    | 29.126656 | 28.831436 | 27.797186 | 29.927185    | 29.506691 | 27.824463    | 30.315731    |          |
| 30.954597 | 32.612637    | 23.957521 | 30.615938 | 31.885504 | 33.299885    | 33.97348     | 28.638852 | 34.95293     | 26.342354 | 34.62154     | 30.949679 | 29.915983 | 29.185658 | 31.868217    | 29.93442  | 27.920769    | 33.13101     |          |
| 29.896727 | 31.367006    | 23.309296 | 29.702187 | 29.664728 | 34.17204     | 30.596016    | 26.931904 | 32.77737     | 25.394743 | 32.940117    | 29.425879 | 29.318668 | 29.92395  | 31.199205    | 28.684015 | 27.818394    | 32.525656    |          |
| 31.966368 | 31.732262    | 28.955254 | 32.217533 | 33.965758 | 36.96076     | Undetermined | 30.890917 | 36.926434    | 27.542263 | Undetermined | 30.773323 | 29.123165 | 30.954885 | 35.360565    | 29.503654 | 29.675978    | 36.987164    |          |
| 29.13179  | 30.975222    | 23.686083 | 27.969929 | 26.978167 | 33.971832    | 29.829737    | 25.957035 | 31.321253    | 23.935347 | 30.659754    | 26.271862 | 26.857943 | 25.284588 | 26.555592    | 29.765263 | 27.229568    | 35.975066    |          |
| 35.9338   | Undetermined | 29.707008 | 32.596526 | 30.222534 | Undetermined | Undetermined | 30.222534 | Undetermined | 27.931898 | Undetermined | 32.34668  | 30.911762 | 30.96048  | 33.60135     | 31.911295 | 27.933468    | Undetermined |          |
| 33.177333 | 35.98559     | 28.98335  | 31.973902 | 30.962734 | Undetermined | 35.98564     | 33.80074  | 34.18444     | 29.41745  | 34.95991     | 31.856709 | 30.318836 | 32.91806  | 30.183487    | 30.94025  | 30.799468    | 35.418472    |          |
| 35.940914 | 34.935248    | 26.724567 | 34.59681  | 34.646812 | 33.979767    | 33.102467    | 28.062527 | 36.949764    | 31.527012 | Undetermined | 27.938301 | 35.27278  | 30.488647 | Undetermined | 32.836014 | 31.560406    | 35.972598    |          |
| 28.168211 | 30.867401    | 24.970154 | 28.474686 | 28.928692 | 32.841472    | 27.951527    | 30.983921 | 23.844221    | 30.912764 | 28.44282     | 27.574528 | 27.003468 | 29.25261  | 27.003468    | 28.613596 | 26.79931     | 32.77282     |          |
| 27.791265 | 27.961922    | 24.728619 | 28.903048 | 29.951584 | 33.53329     | 32.039593    | 27.958002 | 36.933607    | 26.147345 | 29.830755    | 28.530598 | 27.930857 | 25.869856 | 30.466475    | 30.590899 | 27.939922    | 35.95369     |          |
| 32.968544 | 32.34616     | 25.944508 | 28.56284  | 31.791927 | 35.945698    | 33.1569      | 29.418669 | 33.575115    | 25.913866 | 32.936333    | 29.567913 | 28.547153 | 27.236609 | 30.91911     | 29.930396 | 27.93493     | 34.84635     |          |
| 31.678755 | 32.19391     | 27.933306 | 32.995632 | 32.80651  | 36.043285    | 32.136597    | 27.167976 | 27.330882    | 27.330882 | 35.29607     | 28.630404 | 30.055919 | 31.381636 | 34.943893    | 29.813961 | 28.924135    | 30.958965    |          |
| 30.189775 | 30.700808    | 27.619474 | 28.589409 | 29.46851  | 31.623089    | 31.284536    | 26.63826  | 28.721272    | 26.921434 | 32.19802     | 27.939043 | 27.921837 | 28.98983  | 32.18572     | 29.99425  | 26.93504     | 24.96354     |          |
| 34.651978 | 35.98229     | 27.963139 | 33.132965 | 32.058906 | Undetermined | 33.96383     | 28.965646 | 35.752064    | 28.406843 | Undetermined | 32.767982 | 31.17338  | 30.627903 | 35.53226     | 29.933811 | 31.17809     | Undetermined |          |
| 32.859108 | 30.864275    | 25.773619 | 27.965864 | 29.755007 | 34.317825    | 31.962687    | 26.842098 | 33.180252    | 25.166395 | 30.856287    | 28.426384 | 27.935383 | 25.99234  | 29.929636    | 27.929913 | 27.934631    | 33.54136     |          |
| 28.924578 | 27.735958    | 22.966862 | 27.932029 | 29.150066 | 29.077525    | 27.843246    | 26.331553 | 29.808348    | 26.331553 | 29.908348    | 27.963824 | 28.979967 | 27.900032 | 30.974195    | 26.459785 | 32.198833    | 26.599971    |          |
| 28.76205  | 25.951508    | 22.968441 | 27.002531 | 27.09136  | 33.60546     | 29.238111    | 27.440662 | 32.92023     | 24.45622  | 28.575138    | 28.485894 | 26.939365 | 26.40051  | 28.826086    | 28.412367 | 26.95095     | 29.659971    |          |
| 33.16032  | 33.992447    | 25.973518 | 29.955612 | 30.949272 | Undetermined | Undetermined | 27.961025 | 33.942207    | 28.929457 | 34.300167    | 32.576576 | 28.969656 | 29.96401  | 33.588333    | 32.93578  | 28.69752     | 32.984405    |          |
| 27.939446 | 28.430026    | 21.609238 | 27.956917 | 28.145847 | 30.631483    | 29.530966    | 25.329786 | 33.77817     | 24.236948 | 28.791634    | 27.663364 | 25.323467 | 25.728931 | 28.222841    | 30.368536 | 25.72188     | 29.396387    |          |
| 27.816717 | 27.718975    | 23.105272 | 25.917103 | 25.943892 | 30.637274    | 28.441269    | 25.404055 | 30.949255    | 22.92771  | 26.66513     | 24.939342 | 25.35831  | 22.746151 | 27.618279    | 26.916666 | 25.814512    | 30.970802    |          |
| 27.069288 | 29.001596    | 22.877308 | 27.840558 | 28.582401 | 29.98568     | 29.979658    | 25.96327  | 31.972707    | 29.662231 | 27.965623    | 26.902216 | 24.94213  | 24.94213  | 28.93768     | 28.96847  | 26.897078    | 29.868754    |          |
| 29.80108  | 29.643152    | 23.117441 | 27.060896 | 27.367418 | 30.893887    | 28.06516     | 24.536268 | 33.147884    | 25.403679 | 29.658207    | 27.733667 | 24.945679 | 24.69339  | 28.936472    | 29.631063 | 26.93404     | 30.257881    |          |
| 28.93812  | 30.815207    | 22.597988 | 29.773736 | 31.976152 | 29.968456    | 24.93714     | 33.380695 | 30.947132    | 29.946707 | 29.946712    | 28.27432  | 29.569893 | 31.467346 | 28.60211     | 29.569893 | 31.467346    | 29.348366    |          |
| 26.947327 | 27.022831    | 23.147392 | 28.673098 | 29.244349 | 30.58661     | 29.52818     | 25.619799 | 33.6433      | 25.708158 | 29.319994    | 28.97926  | 26.685423 | 26.96094  | 30.391855    | 30.39986  | 26.64884     | 30.31417     |          |
| 31.946426 | 32.40236     | 28.990956 | 32.04963  | 31.110226 | 33.45364     | 35.664803    | 30.214483 | Undetermined | 26.9209   | 35.65866     | 28.84289  | 29.906916 | 29.91971  | 33.321835    | 30.650759 | 29.92158     | 35.941082    |          |
| 30.6963   | 32.181976    | 26.214025 | 30.956915 | 30.053105 | 36.993046    | 32.920143    | 28.938209 | 35.948724    | 27.301699 | 35.948724    | 28.8887   | 28.627598 | 28.627598 | 33.082172    | 33.082172 | 27.507827    | 29.15872     |          |
| 26.09751  | 25.664333    | 21.960863 | 26.960253 | 27.456535 | 28.970135    | 28.902561    | 26.961393 | 33.614872    | 33.91574  | 28.942495    | 25.902203 | 26.46917  | 25.886793 | 28.192314    | 29.3983   | 26.432844    | 31.8967      |          |
| 36.93433  | 35.93161     | 24.979313 | 33.356087 | 32.496044 | 31.64148     | 31.248538    | 36.9565   | 32.930866    | 36.9565   | Undetermined | 26.944696 | 35.623336 | 29.93245  | Undetermined | 32.913986 | 30.915571    | 30.70472     |          |
| 29.719833 | 31.004673    | 26.558638 | 27.176464 | 28.971136 | 34.8598      | 33.525776    | 27.288473 | 26.06975     | 25.760242 | 29.610888    | 27.18738  | 26.802523 | 23.937801 | 28.43624     | 29.210823 | 27.920282    | 34.46958     |          |
| 31.728571 | 34.97501     | 26.799188 | 30.967157 | 32.760273 | Undetermined | Undetermined | 33.149864 | Undetermined | 26.940771 | 34.28149     | 30.490059 | 28.140865 | 28.090641 | 31.033691    | 32.77635  | 31.033691    | Undetermined |          |
| 32.830073 | 33.65416     | 24.274393 | 31.588985 | 31.985138 | 31.770494    | 27.631102    | 35.944553 | 29.902248    | 35.944553 | 34.951668    | 29.924765 | 32.201107 | 33.345757 | 35.92969     | 28.812656 | 29.99913     | 32.90462     |          |
| 35.94915  | 32.070386    | 26.093876 | 30.309386 | 35.79809  | 30.53183     | Undetermined | 30.21293  | 37.218464    | 29.464655 | 31.47128     | 33.751945 | 29.94654  | 29.94654  | 32.95375     | 32.48604  | 31.9201      | Undetermined |          |
| 23.028101 | 25.019745    | 22.71566  | 27.777187 | 29.35451  | 33.950905    | 31.964605    | 36.757656 | 22.923376    | 26.904818 | 23.7905      | 25.82233  | 21.251543 | 26.931824 | 26.931824    | 26.145102 | 32.034866    | 32.034866    |          |
| 29.785866 | 28.776459    | 24.275423 | 30.784586 | 31.948574 | 32.93003     | 32.82178     | 29.973656 | 35.51143     | 27.77121  | 34.10049     | 29.451048 | 29.918531 | 30.14996  | 32.721043    | 29.176641 | 29.918968    | 35.98897     |          |

| IGF2R     | IGFBP1       | IGFBP2    | Ki67         | MCJ       | Mcl-1        | MDR1         | MGMT         | MLH1         | MRP1         | MRP2         | MRP3         | MRP4      | MRP5      | MRP6         | MRP8         | MSH2      | MSH6         |
|-----------|--------------|-----------|--------------|-----------|--------------|--------------|--------------|--------------|--------------|--------------|--------------|-----------|-----------|--------------|--------------|-----------|--------------|
| NM_000876 | NM_000596    | NM_000597 | NM_002417    | NM_013238 | NM_021960    | NM_000927    | NM_002412    | NM_000249    | NM_004996    | NM_000392    | NM_003786    | NM_005845 | NM_005688 | NM_001171    | NM_000352    | NM_000251 | NM_000179    |
| 31.928951 | Undetermined | 24.963078 | Undetermined | 32.93783  | 31.974974    | 36.94381     | 34.223854    | 35.515564    | 34.974327    | Undetermined | 34.976868    | 33.15066  | 32.970375 | 31.96652     | Undetermined | 35.948547 | 35.187252    |
| 29.994975 | 36.041286    | 25.97772  | 33.16957     | 29.946518 | 29.92796     | 33.055508    | 30.775042    | 32.42958     | 30.96388     | 34.97994     | 33.641293    | 32.20387  | 28.7472   | 34.95834     | 29.087872    | 34.95834  | 31.455036    |
| 29.617662 | 34.431225    | 36.94351  | 33.86241     | 31.964712 | 37.021126    | 33.11059     | 32.906284    | 35.922466    | Undetermined | 35.986916    | 36.23146     | 34.97803  | 32.96636  | Undetermined | 33.91501     | 32.6793   | 32.6793      |
| 28.21273  | 35.384377    | 24.796793 | 28.98699     | 25.961796 | 26.75079     | 34.146557    | 30.421448    | 29.93626     | 26.969824    | 28.671227    | 28.64679     | 28.400774 | 24.670924 | 35.94846     | Undetermined | 28.120619 | 28.340464    |
| 32.6553   | Undetermined | 32.96322  | Undetermined | 31.04636  | 30.792309    | 35.01873     | 33.224113    | 35.964436    | 33.949867    | Undetermined | 32.996812    | 33.711185 | 30.447708 | 31.994171    | Undetermined | 35.971073 | 34.586178    |
| 27.012897 | 34.382312    | 22.540596 | 30.854654    | 25.847824 | 26.96131     | 32.128864    | 28.984018    | 29.018982    | 28.825254    | 27.850996    | 27.811766    | 29.739216 | 28.41454  | 27.283722    | 33.930836    | 28.080463 | 29.93988     |
| 29.928493 | 35.957222    | 27.175978 | 29.681833    | 28.203098 | 30.969269    | 34.778313    | 30.52612     | 31.493355    | 31.458689    | 36.97744     | 34.941124    | 30.88322  | 29.440989 | 33.36093     | 32.288002    | 28.848902 | 30.95761     |
| 31.302174 | Undetermined | 29.981476 | Undetermined | 28.32243  | 31.245064    | 33.969794    | 32.770752    | 32.874897    | 31.722162    | 34.94303     | 34.90888     | 30.973543 | 30.973543 | 31.348793    | Undetermined | 31.9658   | 33.34517     |
| 28.769897 | Undetermined | 27.504595 | 32.870472    | 27.429928 | 27.429928    | 35.414993    | 30.92903     | 30.92903     | 34.399864    | 29.213509    | 31.884996    | 29.304969 | 29.97817  | 31.884996    | Undetermined | 30.17516  | 30.323505    |
| 31.318583 | Undetermined | 26.152075 | 34.91722     | 29.497309 | 30.071558    | 36.948536    | 31.888933    | 32.834328    | 30.526608    | 36.934036    | 35.96951     | 33.948505 | 29.455112 | 33.51761     | Undetermined | 31.90714  | 31.981173    |
| 29.934576 | 31.394733    | 28.935808 | 35.5729      | 27.957603 | 27.348541    | 35.518417    | 30.52123     | 31.67024     | 28.973766    | 32.160934    | 31.39899     | 32.867504 | 29.989801 | 31.3633      | Undetermined | 30.969856 | 30.969856    |
| 31.971952 | Undetermined | 29.311823 | Undetermined | 33.141827 | 34.01116     | 36.99786     | Undetermined | 35.007893    | 35.98478     | Undetermined | Undetermined | 35.946503 | 33.596962 | 34.974064    | Undetermined | 35.186398 | 33.947906    |
| 28.31111  | 32.958305    | 28.990932 | 31.87104     | 26.960203 | 27.951479    | 32.741077    | 29.956112    | 30.139904    | 29.965553    | 33.782757    | 28.597027    | 31.332224 | 29.773448 | 29.773448    | Undetermined | 31.506422 | 31.506422    |
| 33.93591  | 35.779907    | 32.407776 | Undetermined | 30.795298 | 32.474837    | 34.944786    | 36.982788    | 35.9153      | 35.96725     | Undetermined | 35.965855    | 35.4476   | 34.299973 | 33.953       | Undetermined | 34.299973 | 35.93505     |
| 33.30196  | Undetermined | 31.64191  | 35.87977     | 29.921115 | 33.963657    | 35.65419     | 32.553265    | 35.008087    | 33.520113    | Undetermined | Undetermined | 35.765213 | 32.93044  | 35.57456     | Undetermined | 33.36881  | 32.659912    |
| 33.850292 | Undetermined | 28.27511  | Undetermined | 35.912792 | 30.473095    | Undetermined | 35.34999     | Undetermined | 30.17772     | Undetermined | Undetermined | 35.942165 | 29.87305  | 33.84345     | Undetermined | 35.93727  | 32.761925    |
| 28.887125 | 35.948395    | 25.980293 | 31.473217    | 26.37012  | 27.91849     | 32.583126    | 28.978938    | 30.650963    | 28.905895    | 34.93891     | 31.753631    | 31.047895 | 27.954899 | 32.692028    | Undetermined | 28.878504 | 28.87464     |
| 31.456722 | Undetermined | 27.471798 | 31.922705    | 27.397318 | 31.948946    | 35.95753     | 31.835482    | 32.664963    | 28.976255    | 28.680462    | 31.678406    | 30.953806 | 28.45212  | 33.960854    | Undetermined | 28.932634 | 31.949333    |
| 31.944653 | Undetermined | 27.78261  | 32.952087    | 27.958078 | 32.251038    | 32.92641     | 32.977337    | 32.951946    | 32.87158     | 32.92158     | Undetermined | 32.80218  | 27.966816 | 34.885174    | Undetermined | 30.49205  | 32.349556    |
| 30.915514 | 34.695625    | 26.2807   | 35.955725    | 32.947643 | 32.574112    | Undetermined | 35.688416    | 33.303005    | 34.950333    | Undetermined | 35.961697    | 35.890737 | 33.021168 | 34.73795     | Undetermined | 32.85471  | 31.979935    |
| 28.63773  | 34.991793    | 28.810799 | 35.33942     | 30.16082  | 27.46672     | 30.689135    | 30.98058     | 30.25976     | 32.37382     | 35.959255    | 32.916897    | 33.304943 | 28.214188 | 28.67304     | 33.99472     | 31.155724 | 29.861525    |
| 33.122917 | 36.006325    | 32.17461  | Undetermined | 33.22431  | 33.992596    | Undetermined | 37.021896    | 34.42486     | 34.97828     | 37.13746     | Undetermined | 36.00141  | 34.83427  | 34.078304    | Undetermined | 33.865402 | 34.55174     |
| 31.935968 | Undetermined | 30.760778 | 34.30878     | 26.964725 | 30.864336    | 33.113106    | 32.32329     | 32.737427    | 30.337126    | 35.26605     | 31.980137    | 32.51941  | 30.266975 | 29.911627    | Undetermined | 29.94654  | 31.968704    |
| 28.948706 | 35.985626    | 30.820343 | 35.06248     | 27.43498  | 27.786253    | Undetermined | 29.629757    | 32.57075     | 25.3399154   | 31.404623    | 29.449785    | 31.813751 | 25.408838 | 30.540756    | Undetermined | 30.04529  | 28.241257    |
| 27.93157  | 33.52721     | 26.693865 | 31.977259    | 26.142052 | 26.026272    | Undetermined | 29.09198     | 30.592989    | 26.981052    | 28.902077    | 28.97335     | 30.93361  | 26.972456 | 30.299593    | 32.3811      | 28.624134 | 27.96503     |
| 33.921276 | Undetermined | 29.32918  | Undetermined | 28.96847  | 32.940746    | 34.228947    | 33.930042    | 30.95918     | 35.926388    | 34.980427    | 31.056946    | 30.960655 | 32.485386 | Undetermined | 34.965622    | 32.963007 | 34.965622    |
| 28.63773  | 31.982805    | 24.502942 | 30.892275    | 26.751442 | 26.905876    | 34.2942      | 28.98606     | 30.941324    | 26.682693    | 33.948055    | 32.284687    | 29.556072 | 26.410693 | 31.948795    | Undetermined | 27.85418  | 27.109915    |
| 27.556711 | 34.436436    | 24.612787 | 28.43735     | 24.961765 | 26.971104    | 31.31748     | 27.345749    | 29.728802    | 27.349022    | 33.44814     | 32.52754     | 28.81324  | 27.370693 | 29.042637    | 34.942795    | 26.930995 | 27.430834    |
| 28.622974 | 36.012096    | 23.979063 | 30.33553     | 27.76441  | 27.049181    | 33.93960     | 27.606133    | 30.96997     | 26.706999    | 33.77615     | 34.299976    | 30.401155 | 25.546143 | 30.855085    | Undetermined | 27.956    | 28.642925    |
| 29.02333  | 32.99496     | 25.986368 | 30.653448    | 26.813982 | 26.360052    | 30.656977    | 29.232557    | 28.933651    | 28.008524    | 33.248158    | 28.132002    | 24.69638  | 27.383467 | 28.965014    | Undetermined | 28.320543 | 29.425928    |
| 30.009268 | Undetermined | 29.420055 | 32.930805    | 28.186827 | 24.933182    | 37.057293    | 29.843487    | 31.77552     | 26.741318    | 31.721573    | 32.09334     | 28.806873 | 25.084879 | 30.96246     | Undetermined | 30.947704 | 28.72306     |
| 29.364021 | 34.14233     | 28.283161 | 31.721508    | 26.96907  | 26.739159    | Undetermined | 30.953955    | 31.285105    | 26.358961    | 26.938572    | 30.044844    | 27.238832 | 24.825085 | 32.647457    | Undetermined | 29.579565 | 28.980356    |
| 30.235432 | Undetermined | 26.35942  | 34.681635    | 30.948246 | 30.493454    | 33.96301     | 32.355885    | 34.269536    | 32.272655    | Undetermined | Undetermined | 34.838585 | 31.087934 | 32.14142     | Undetermined | 34.922653 | 32.799552    |
| 30.922739 | 34.516117    | 28.071882 | 32.729884    | 31.603554 | 32.682817    | 35.028012    | 32.117702    | 32.250443    | 35.6331      | Undetermined | 34.97692     | 35.940643 | 34.983654 | 31.948062    | Undetermined | 31.975445 | 31.975445    |
| 27.9377   | 35.984974    | 24.013578 | 30.2777      | 26.607433 | 26.486464    | 34.613953    | 28.775957    | 29.945425    | 26.518297    | 28.185339    | 29.972012    | 29.954361 | 26.478981 | 32.812607    | Undetermined | 24.656421 | 26.006104    |
| 35.395683 | 35.119152    | 28.99852  | Undetermined | 32.367443 | 30.973436    | Undetermined | 35.314545    | Undetermined | 31.542444    | Undetermined | Undetermined | 36.80525  | 33.015347 | 32.8132843   | 35.945076    | 31.162655 | 31.828133    |
| 29.956137 | 35.013546    | 28.56794  | 33.511993    | 27.326271 | 29.95125     | 29.97622     | 30.444632    | 29.989513    | 31.5025      | 33.690273    | 27.953651    | 30.479542 | 28.736582 | 32.819263    | 30.876568    | 28.94769  | 30.636145    |
| 33.993206 | Undetermined | 33.969707 | Undetermined | 31.195486 | 34.191467    | Undetermined | 35.94749     | 34.46179     | 33.96953     | 35.72553     | 30.76676     | 30.971336 | 32.97004  | 35.97767     | Undetermined | 33.480885 | 35.2438      |
| 31.889206 | Undetermined | 29.179499 | Undetermined | 30.58429  | 27.978909    | Undetermined | 32.693568    | 36.929043    | 29.183553    | 35.95273     | 37.128605    | 34.81895  | 26.949172 | 32.71849     | Undetermined | 34.55931  | 31.190191    |
| 36.96329  | 35.249783    | 33.412724 | Undetermined | 29.177147 | Undetermined | 34.91699     | 35.141823    | 33.2961      | 36.96591     | Undetermined | Undetermined | 34.947273 | 33.129177 | Undetermined | Undetermined | 32.677273 | Undetermined |
| 28.93509  | 34.68949     | 24.676505 | 28.924475    | 26.662743 | 27.716047    | 31.80056     | 30.395359    | 29.976416    | 26.96649     | 30.086565    | 30.005722    | 29.227652 | 27.541216 | 33.955063    | Undetermined | 24.715246 | 28.279587    |
| 31.436304 | Undetermined | 28.480928 | 36.569473    | 29.954893 | 30.678722    | 36.94384     | 33.9473      | 33.667088    | 29.630238    | 29.947716    | 32.98306     | 33.10519  | 28.334332 | 33.254417    | Undetermined | 29.87072  | 31.956053    |

| MTII      | mTOR      | MVP       | NFKB      | OPRT         | p16          | p21       | p27       | p53       | PBGD      | PIK3CA       | PTEN         | Rad51     | RRM1         | SDHA      | SOD1      | STAT3     | Survivin     |
|-----------|-----------|-----------|-----------|--------------|--------------|-----------|-----------|-----------|-----------|--------------|--------------|-----------|--------------|-----------|-----------|-----------|--------------|
| 29.962408 | 33.321762 | 27.97558  | 30.971024 | Undetermined | 32.436333    | 28.974901 | 28.022068 | 32.19223  | 31.644325 | 33.466095    | Undetermined | 34.112137 | 33.571045    | 32.078617 | 27.832817 | 28.965492 | 34.943974    |
| 24.664638 | 31.227728 | 26.486126 | 28.195653 | 33.27842     | 28.393717    | 26.724525 | 30.95959  | 30.80683  | 30.95959  | 30.80683     | Undetermined | 29.954587 | 28.139872    | 30.463211 | 26.903961 | 27.969719 | 29.96859     |
| 31.00002  | 31.056969 | 28.937626 | 32.95616  | 34.26061     | 30.472601    | 26.776405 | 31.002958 | 30.924198 | 30.924198 | 33.720932    | 36.01254     | 32.19797  | 32.060818    | 29.944525 | 26.761955 | 27.945574 | 36.93921     |
| 25.942995 | 29.736126 | 26.392607 | 28.266281 | 31.52632     | 33.64612     | 26.712067 | 25.633284 | 28.1746   | 28.485266 | 28.2628      | 30.915688    | 27.637745 | 27.19787     | 26.638718 | 23.78827  | 26.805656 | 29.57397     |
| 26.822767 | 33.974342 | 26.218904 | 31.014791 | Undetermined | 34.981976    | 30.004053 | 28.825905 | 33.98614  | 32.96261  | 33.98614     | 37.01496     | 35.83946  | 32.938915    | 27.962965 | 33.945377 | 29.984476 | 33.98724     |
| 24.99381  | 28.682379 | 23.419338 | 26.024231 | 31.839396    | 30.72843     | 27.603762 | 25.965143 | 28.458267 | 28.217262 | 30.979393    | 32.123928    | 28.94901  | 27.935953    | 26.625826 | 24.259172 | 25.405762 | 32.34326     |
| 25.644823 | 30.741879 | 28.41992  | 29.94791  | 33.929806    | 27.951046    | 27.9744   | 28.966825 | 29.945957 | 32.90557  | 36.00493     | 36.00493     | 29.197636 | 27.470947    | 29.443714 | 26.61928  | 27.959797 | 30.9705      |
| 25.400793 | 31.327105 | 26.957544 | 28.398603 | 35.456998    | 33.35983     | 29.66406  | 27.683432 | 31.667366 | 29.536908 | 33.519756    | 31.74614     | 31.449482 | 30.900175    | 30.929611 | 25.959253 | 27.945887 | 35.8139      |
| 25.531582 | 30.846746 | 24.957615 | 27.780516 | 34.930103    | 29.2224      | 27.809217 | 26.799889 | 29.669764 | 28.938415 | 32.4752      | 33.168492    | 30.726458 | 29.45106     | 27.408792 | 26.554815 | 26.629248 | 32.130447    |
| 27.179392 | 32.881496 | 26.651426 | 27.96397  | Undetermined | 31.154541    | 27.957    | 27.75767  | 30.825983 | 29.905592 | 34.67626     | 35.98853     | 29.980415 | 29.534742    | 29.984589 | 27.65847  | 27.95704  | 32.94918     |
| 26.51154  | 31.542713 | 25.437735 | 27.59761  | Undetermined | 31.935211    | 27.900229 | 26.942926 | 30.953884 | 28.88627  | 33.95028     | 31.966805    | 31.979342 | 30.661757    | 28.39519  | 26.940685 | 26.403189 | 32.725735    |
| 28.53989  | 33.56506  | 29.964626 | 32.83016  | 36.935074    | 33.50354     | 28.46661  | 27.938423 | 32.83843  | 32.9959   | 32.96903     | Undetermined | 33.97527  | 32.0011      | 35.35268  | 27.983133 | 26.431768 | Undetermined |
| 25.98105  | 29.961508 | 24.340755 | 27.870817 | 32.819237    | 33.229267    | 26.28201  | 25.679036 | 29.981836 | 28.752165 | 31.933193    | 32.849503    | 30.97985  | 28.899502    | 26.89734  | 24.943842 | 26.55999  | 32.271065    |
| 27.54167  | 33.943935 | 29.31601  | 32.963543 | Undetermined | 34.958942    | 28.85496  | 29.951872 | 35.977077 | 33.28396  | 36.917557    | Undetermined | 35.051919 | 33.94596     | 33.981056 | 26.350164 | 31.294632 | Undetermined |
| 28.94745  | 32.80745  | 29.947556 | 31.72855  | 36.94058     | Undetermined | 29.755794 | 29.701157 | 34.614143 | 33.15529  | 33.17178     | Undetermined | 35.94044  | 30.775797    | 30.775797 | 28.290606 | 30.955608 | Undetermined |
| 28.195017 | 35.89595  | 28.503868 | 29.607925 | Undetermined | 35.64057     | 31.955921 | 32.315464 | 34.953262 | 31.925523 | Undetermined | 31.962208    | 34.956223 | 36.376663    | 33.75864  | 30.47943  | 27.807781 | 34.962563    |
| 25.675814 | 29.412077 | 25.385475 | 27.728245 | 31.994482    | 27.218667    | 26.809404 | 25.43223  | 29.634825 | 29.43223  | 31.035471    | Undetermined | 34.983105 | 28.574871    | 27.755493 | 25.9386   | 26.48479  | 31.299185    |
| 25.402754 | 30.759293 | 27.640419 | 28.769978 | 33.48767     | 29.939129    | 28.591398 | 26.937494 | 30.67598  | 29.45379  | 31.562119    | Undetermined | 28.974225 | 29.943182    | 31.605328 | 25.88264  | 28.04165  | 32.435043    |
| 28.958103 | 31.848259 | 27.15652  | 28.614403 | Undetermined | 35.37849     | 28.81404  | 27.331257 | 30.943193 | 29.937548 | 31.733639    | Undetermined | 30.470919 | 32.558884    | 30.370115 | 27.455884 | 27.956541 | 32.9035      |
| 29.96343  | 32.33908  | 28.25061  | 31.962322 | Undetermined | 30.519606    | 27.521389 | 27.700619 | 30.126211 | 30.581312 | 33.58125     | 31.816559    | 32.242847 | 30.100027    | 31.3478   | 27.606544 | 27.492556 | 35.952965    |
| 28.21167  | 30.502499 | 25.487871 | 28.640488 | Undetermined | 31.91603     | 26.422247 | 25.35119  | 29.630735 | 30.96753  | 31.98256     | 29.118298    | 32.930122 | 29.459745    | 27.66696  | 25.629015 | 25.984137 | 35.718544    |
| 32.57602  | 32.52896  | 28.963953 | 32.558712 | 37.15324     | 37.0124      | 29.57698  | 28.925683 | 32.558024 | 32.87698  | 32.258024    | Undetermined | 32.874493 | 33.243412    | 31.752155 | 29.58974  | 29.240677 | Undetermined |
| 25.26011  | 30.156006 | 24.947598 | 27.669565 | 35.148823    | 32.407043    | 27.96476  | 26.875504 | 31.082159 | 28.818502 | 31.94894     | 35.943058    | 30.968184 | 29.909473    | 30.948244 | 26.622124 | 27.700443 | 34.977764    |
| 26.943855 | 30.944681 | 24.812134 | 26.955343 | 36.955553    | 28.211044    | 28.602219 | 26.926125 | 27.24507  | 31.94961  | 28.5318      | 28.5318      | 27.24507  | 27.893938    | 28.188253 | 25.961193 | 28.948878 | 30.940085    |
| 25.04298  | 29.63013  | 23.18371  | 25.03381  | 34.81293     | 34.44591     | 26.819618 | 26.258743 | 27.592428 | 26.837772 | 31.456293    | 32.981003    | 28.946821 | 27.939142    | 27.757202 | 24.52177  | 25.015124 | 30.159323    |
| 28.942913 | 33.96878  | 28.608477 | 29.762491 | Undetermined | 35.94441     | 29.6305   | 28.940466 | 31.973557 | 29.936888 | 33.371375    | Undetermined | 32.37125  | 32.112034    | 33.0278   | 29.371738 | 29.762598 | Undetermined |
| 24.80015  | 29.511227 | 24.515257 | 25.946987 | 33.41011     | 27.95261     | 25.613949 | 25.8014   | 29.978193 | 28.144025 | 29.50912     | 31.433693    | 27.734572 | 26.602196    | 26.924934 | 24.699799 | 24.980726 | 29.954996    |
| 23.31567  | 28.040524 | 23.955418 | 26.39105  | 32.946373    | 32.50835     | 25.969353 | 24.943151 | 28.85778  | 25.939556 | 28.572477    | 33.01371     | 27.56306  | 27.412828    | 26.977348 | 23.949492 | 25.03706  | 29.455587    |
| 23.960451 | 28.943518 | 24.97036  | 26.244864 | 33.566364    | 27.760085    | 25.974878 | 25.82796  | 27.983746 | 27.51418  | 28.945805    | 32.551125    | 27.459095 | 26.748539    | 27.83119  | 24.06139  | 26.498979 | 28.458263    |
| 23.93257  | 29.389158 | 23.947641 | 25.982954 | 33.858192    | 29.90098     | 26.693367 | 25.785057 | 28.462103 | 27.246264 | 30.519957    | 36.99102     | 28.953227 | 28.448715    | 27.962818 | 25.866106 | 25.988478 | 31.52397     |
| 28.859941 | 33.486786 | 36.92475  | 26.530684 | 36.92475     | 29.650726    | 27.797588 | 26.988758 | 28.732046 | 27.467037 | 33.922443    | 31.072437    | 28.98091  | 28.939157    | 29.508276 | 26.303093 | 31.979757 | 31.979757    |
| 26.066063 | 31.530733 | 25.164564 | 26.954435 | 34.531647    | 32.650112    | 27.96328  | 26.78326  | 28.819462 | 29.710987 | 30.905294    | 33.992752    | 29.354187 | 28.852169    | 27.555372 | 25.956415 | 26.61359  | 31.719774    |
| 28.899693 | 31.870302 | 26.906437 | 31.148493 | Undetermined | 27.965387    | 28.195755 | 27.75958  | 32.97357  | 30.939394 | 30.90963     | 32.979664    | 31.955978 | 31.16631     | 29.901814 | 27.9439   | 28.469843 | 33.2074      |
| 28.954662 | 31.940165 | 28.973818 | 32.74385  | 34.352856    | 27.70387     | 28.983725 | 26.784843 | 33.658573 | 30.892445 | 33.95855     | Undetermined | 31.35476  | 30.935041    | 26.469072 | 28.949114 | 30.9285   | 30.9285      |
| 24.955505 | 28.049597 | 24.640667 | 26.942554 | 32.397392    | 31.94456     | 26.731216 | 25.933737 | 27.77134  | 27.344494 | 29.945473    | 31.677574    | 27.421255 | 26.937172    | 25.681528 | 24.799177 | 24.945473 | 28.954561    |
| 28.526417 | 36.881546 | 26.412296 | 28.647526 | Undetermined | 31.659136    | 33.553246 | 31.650297 | 30.793135 | 30.983812 | 35.93082     | Undetermined | 30.983812 | 35.93082     | 34.693024 | 36.96661  | 31.833233 | 26.383108    |
| 27.619905 | 29.955347 | 26.761017 | 28.076708 | 33.520485    | 34.944866    | 27.454627 | 25.575405 | 30.95378  | 30.751625 | 30.250128    | 31.703213    | 36.002064 | 29.522373    | 29.513552 | 25.943964 | 26.980087 | 33.970116    |
| 28.21784  | 35.13888  | 28.912033 | 31.11295  | Undetermined | 30.159155    | 29.962814 | 33.852146 | 31.787128 | 32.962814 | 31.787128    | Undetermined | 33.612255 | 33.6301      | 33.912384 | 28.435095 | 33.78225  | 35.718987    |
| 30.82013  | 35.152546 | 25.764555 | 28.04048  | Undetermined | 33.362507    | 28.98909  | 29.934113 | 31.328945 | 29.92548  | 35.90885     | 31.335947    | 32.571255 | 32.773903    | 32.811275 | 29.7901   | 26.834656 | 34.962498    |
| 28.970785 | 34.881393 | 32.39263  | 31.479729 | Undetermined | 32.98331     | 31.938892 | 33.985985 | 33.181877 | 37.004257 | 33.985985    | 37.004257    | 32.07525  | Undetermined | 32.851357 | 29.982206 | 31.880374 | 34.24343     |
| 22.816225 | 28.514206 | 26.827449 | 26.812523 | 32.962168    | 26.930476    | 25.963583 | 25.655384 | 30.520285 | 28.479406 | 34.862392    | 27.505077    | 26.469767 | 26.670025    | 24.850466 | 26.360437 | 28.900717 | 28.900717    |
| 29.078693 | 32.08874  | 26.952868 | 29.709215 | Undetermined | 30.891533    | 29.349812 | 28.873493 | 31.973448 | 30.927082 | 33.74797     | 33.93798     | 31.171516 | 31.834389    | 30.162659 | 27.967876 | 28.231764 | 33.95845     |

| TAP1      | TAP2      | TAP4         | TBP          | Topo I    | Topo Iia     | Topo Iib  | TS           | VEGF        | XIAP         | XPA       | XRCC1        | XRCC5     | XRCC6     |
|-----------|-----------|--------------|--------------|-----------|--------------|-----------|--------------|-------------|--------------|-----------|--------------|-----------|-----------|
| NM_000593 | NM_000544 | NM_000443    | NM_003194    | NM_003286 | NM_001067    | NM_001068 | NM_001071    | NM_00102366 | NM_001167    | NM_000380 | NM_006297    | NM_021141 | NM_001469 |
| 31.989246 | 31.708282 | Undetermined | 34.448986    | 32.23805  | 36.927822    | 29.53466  | 34.51271     | 30.526436   | 34.215023    | 31.723518 | 32.8155      | 28.98843  | 26.99527  |
| 27.020311 | 28.48231  | 32.52358     | 30.93243     | 29.89631  | 28.081104    | 26.694838 | 29.38104     | 28.964843   | 30.250486    | 30.250486 | 29.073896    | 27.736588 | 25.987005 |
| 31.994171 | 32.614098 | Undetermined | 32.841755    | 33.477097 | 36.95489     | 31.903547 | 34.897335    | 28.121754   | 34.460693    | 29.0868   | 35.64084     | 27.957245 | 25.88628  |
| 27.620062 | 28.501434 | 36.99367     | 29.640278    | 27.898216 | 27.934883    | 25.979172 | 28.911234    | 26.959887   | 28.923525    | 27.964767 | 27.33152     | 25.963552 | 24.453907 |
| 29.394665 | 30.554958 | Undetermined | 33.61538     | 30.384083 | 30.339396    | 28.338358 | 35.12798     | 31.98613    | 32.027206    | 32.999683 | 34.631382    | 29.980776 | 27.976376 |
| 26.946352 | 27.970369 | 31.384697    | 29.730217    | 26.444498 | 29.486536    | 25.979746 | 30.159155    | 27.442368   | 28.697811    | 28.168848 | 27.041151    | 25.111134 | 24.417665 |
| 27.569435 | 29.6964   | 32.94737     | 29.917988    | 28.837582 | 27.677073    | 26.950815 | 28.357712    | 27.799454   | 30.9271      | 30.225016 | 32.09198     | 25.9598   | 25.967104 |
| 29.76398  | 30.973932 | 34.307842    | 31.539742    | 30.939095 | 34.68298     | 27.935444 | 33.624363    | 29.110718   | 31.889622    | 31.621492 | 29.355091    | 28.035282 | 27.354404 |
| 27.990862 | 28.794031 | 34.942028    | 31.71358     | 27.92089  | 31.07477     | 27.716406 | 31.935497    | 26.543215   | 29.941835    | 29.8715   | 31.00407     | 25.950277 | 25.711967 |
| 27.659182 | 28.929342 | 36.930866    | 32.868295    | 30.905193 | 32.631386    | 28.502117 | 32.68422     | 28.616886   | 32.262054    | 30.974766 | 30.435518    | 26.972353 | 26.69503  |
| 27.247072 | 28.124702 | 35.895673    | 31.941513    | 29.876904 | 32.793007    | 28.679012 | 32.577896    | 27.976215   | 31.067322    | 30.48931  | 28.493864    | 26.385485 | 26.439928 |
| 32.26875  | 32.961628 | 36.988068    | 33.49778     | 34.928738 | 36.899532    | 30.780052 | 36.379192    | 30.61465    | 34.729004    | 32.53489  | Undetermined | 28.744238 | 27.872543 |
| 26.962666 | 27.960672 | 33.765224    | 29.970161    | 27.825619 | 30.933496    | 25.93251  | 31.540812    | 27.90151    | 28.938486    | 28.625397 | 28.733738    | 25.671375 | 24.95917  |
| 31.69976  | 33.962803 | Undetermined | 35.970127    | 31.919281 | 33.436214    | 29.929136 | 35.754833    | 30.948902   | 34.972775    | 32.738094 | 35.64598     | 30.74531  | 26.590213 |
| 31.668021 | 32.666035 | Undetermined | 34.569355    | 32.94291  | 37.12513     | 30.182596 | Undetermined | 31.608507   | 34.41442     | 31.442673 | 35.477862    | 30.492435 | 28.841818 |
| 32.392067 | 31.80275  | Undetermined | Undetermined | 34.7319   | Undetermined | 33.59678  | 36.93636     | 29.915035   | Undetermined | 35.978027 | 32.669918    | 29.96345  | 28.971514 |
| 26.855806 | 27.963236 | 33.960182    | 30.948305    | 27.933825 | 27.301884    | 26.647217 | 30.266665    | 26.401887   | 29.940714    | 28.1072   | 30.974136    | 26.66843  | 24.827063 |
| 28.961786 | 30.253284 | 36.976494    | 31.39687     | 29.513021 | 30.268023    | 26.67883  | 30.315805    | 29.407991   | 30.9213      | 32.599648 | 31.960014    | 27.874783 | 25.367382 |
| 28.722286 | 29.896841 | 33.78924     | 31.930454    | 30.88647  | 31.945505    | 27.100758 | 32.66763     | 30.629852   | 31.869736    | 32.97633  | 31.694742    | 27.336592 | 25.963503 |
| 30.97025  | 31.960043 | Undetermined | 32.19367     | 33.61302  | 33.493855    | 31.950888 | 35.92027     | 28.18433    | Undetermined | 30.775196 | 33.924786    | 26.81771  | 26.443497 |
| 27.112385 | 27.945482 | 32.648193    | 29.938316    | 30.899248 | 30.832003    | 27.738232 | 32.328896    | 27.075796   | 31.948803    | 26.946287 | 28.261673    | 25.68113  | 25.089302 |
| 32.781375 | 33.81368  | Undetermined | 34.338062    | 34.578114 | Undetermined | 31.9463   | 36.91999     | 31.020388   | 34.86631     | 33.69089  | Undetermined | 29.183044 | 28.0448   |
| 27.851828 | 28.97145  | Undetermined | 31.88421     | 28.86831  | 31.582287    | 26.93351  | 32.641983    | 27.9521     | 30.39199     | 31.571814 | 30.982527    | 26.969152 | 25.925932 |
| 28.37022  | 28.129333 | 34.10121     | 30.759312    | 29.039522 | 30.90541     | 28.013245 | 31.918406    | 26.750246   | 31.981987    | 30.024721 | 28.686665    | 25.885849 | 24.94906  |
| 25.97105  | 26.092588 | 32.734974    | 30.683       | 27.899435 | 29.506716    | 26.711058 | 29.766218    | 25.584309   | 30.313267    | 28.733177 | 25.973778    | 25.66706  | 25.025637 |
| 29.929857 | 30.874971 | 36.953373    | 33.927505    | 31.88593  | 28.421368    | 28.146147 | Undetermined | 28.957941   | 35.7396      | 31.921503 | Undetermined | 29.966175 | 27.948112 |
| 25.722597 | 26.598001 | 35.36339     | 29.371677    | 27.721048 | 28.161701    | 26.931723 | 27.93158     | 24.967104   | 29.963879    | 29.895979 | 28.959955    | 25.324063 | 24.983179 |
| 26.381823 | 26.97091  | 33.37103     | 28.723288    | 26.79198  | 26.927732    | 25.257631 | 28.376795    | 24.966763   | 27.9176      | 28.976957 | 28.872307    | 24.670034 | 24.070204 |
| 26.983969 | 27.403034 | 33.953728    | 29.840647    | 27.721088 | 28.335304    | 26.025133 | 29.495801    | 25.528006   | 29.93872     | 29.229927 | 27.3874      | 25.964174 | 24.489508 |
| 25.972033 | 26.956276 | 32.525997    | 29.654167    | 26.907473 | 26.221678    | 26.488815 | 30.451317    | 25.849588   | 29.180346    | 27.13311  | 26.848541    | 25.978271 | 24.226374 |
| 27.961206 | 27.413446 | 35.429905    | 31.855995    | 30.580404 | Undetermined | 28.935606 | 33.608845    | 24.999298   | 31.8804      | 28.016817 | 27.352455    | 26.634504 | 26.072826 |
| 27.349806 | 27.945496 | 34.869896    | 30.747776    | 29.490908 | 27.204195    | 27.921421 | 31.959244    | 26.231554   | 30.935575    | 27.87728  | 30.040262    | 27.416704 | 25.973648 |
| 30.66463  | 30.720015 | Undetermined | 32.945072    | 31.928835 | 32.128395    | 30.366568 | 33.242393    | 29.964985   | 32.957203    | 31.988653 | 33.37176     | 28.758392 | 26.945557 |
| 31.938076 | 32.973907 | 32.723053    | 31.914948    | 29.473583 | 31.215363    | 29.647562 | 33.10374     | 29.923777   | 33.264986    | 31.649982 | 34.97941     | 28.600042 | 26.157867 |
| 25.9702   | 27.523062 | 33.202923    | 29.176727    | 27.32739  | 27.949512    | 26.280857 | 29.949678    | 27.326355   | 28.60224     | 28.40853  | 29.233784    | 25.525711 | 23.75166  |
| 31.971409 | 32.90211  | 36.96008     | 36.942337    | 35.910583 | Undetermined | 34.92617  | Undetermined | 28.46313    | Undetermined | 34.91871  | 32.1492      | 28.978323 | 27.952915 |
| 28.436346 | 30.981913 | 34.532795    | 30.40505     | 28.86616  | 28.528519    | 25.942888 | 32.987278    | 28.94568    | 28.94568     | 28.698112 | 29.151043    | 26.60305  | 24.9691   |
| 30.138563 | 31.834788 | 36.936035    | 33.19502     | 33.19502  | 31.833366    | 29.882286 | 32.1831      | 32.782883   | 34.38128     | 32.95883  | 33.88702     | 29.6837   | 28.118425 |
| 29.968555 | 29.741652 | 35.762554    | 33.93405     | 34.486507 | 35.96947     | 32.59688  | 34.9258      | 28.561327   | 31.99481     | 32.68469  | 31.21049     | 27.952435 | 28.32828  |
| 31.515175 | 35.094624 | Undetermined | 34.943306    | 34.107893 | 30.469894    | 34.41137  | 30.469894    | 33.842773   | 31.048735    | 35.743286 | 34.649384    | 35.967056 | 30.269209 |
| 26.92385  | 29.97089  | 31.955585    | 29.424538    | 27.539015 | 28.81747     | 25.61987  | 27.59117     | 25.56683    | 26.877566    | 28.710335 | 30.95702     | 25.94323  | 23.348915 |
| 29.589556 | 30.655993 | Undetermined | 32.303524    | 31.866613 | 33.951862    | 30.3764   | 34.62987     | 28.851149   | 33.9779      | 31.973772 | 33.249004    | 28.858095 | 26.928545 |
